# Supplementary material for: Extracellular ATP is a danger signal activating P2X7 receptor in a LPS mediated inflammation (ARDS/ALI)
Source: PubMed Central journal article supplement (PMC6078145; doi:10.18632/oncotarget.25761), 2018-07-17
Supplement: oncotarget-09-30635-s001.pdf [file oncotarget-09-30635-s001.pdf]

## Extracellular ATP is a danger signal activating P2X7 receptor in a LPS mediated inflammation (ARDS/ALI)

### SUPPLEMENTARY MATERIALS

**Supplementary Table 1: Patient and BALF characteristics (healthy, Pneumonie, ARDS): Cicko *et al.* 2018**

|                                        | Healthy controls | Pneumonie   | ARDS        |
|----------------------------------------|------------------|-------------|-------------|
| <b>Patient characteristics</b>         | 6                | 30          | 19          |
| No. of subjects                        | 2/4              | 18/12       | 17/3        |
| Sex, M/F                               | 43,8 (15,2)      | 61,7 (16,8) | 60,5 (17,0) |
| Age, jr (SD)                           | 0 (0)            | 4,2 (9,7)   | 47,0 (29,0) |
| Pack-years (SD)                        |                  |             |             |
| <b>BALF characteristics</b>            |                  |             |             |
| 10 <sup>6</sup> cells/100 ml BALF (SD) | 5,1 (2,9)        | 14,9 (9,5)  | 22,8 (21,4) |
| Macrophages, % (SD)                    | 99,6 (0,5)       | 64,3 (26,0) | 48,3 (33,3) |
| Neutrophils, % (SD)                    | 0,3 (0,5)        | 7,7 (12,1)  | 39,1 (31,9) |
| Eosinophils, % (SD)                    | 0 (0)            | 4,0 (8,9)   | 1,8 (2,5)   |
